# Supplementary material for: Five new coordination polymers with a Y-shaped N-heterocyclic carboxylic acid: structural diversity, bifunctional luminescence sensing and magnetic properties
Source: Royal Society of Chemistry journal article supplement (doi:10.1039/c9ce00988d), 2019-01-01
Supplement: c9ce00988d1.pdf [file c9ce00988d1.pdf]

*Electronic Supplementary Information (ESI) for*

## **Five new Coordination Polymers with a Y-shaped N-heterocyclic carboxylic acid: Structural Diversity, Bifunctional Luminescence Sensing and Magnetic Properties**

Jinxia Liang<sup>a</sup>, Jie Zhang<sup>a</sup>, Jinfang Liang<sup>a</sup>, Lijun Zhai<sup>a</sup>, Haonan Wu<sup>a</sup>, Xiaoyan Niu<sup>a</sup> and Tuoping Hu<sup>a\*</sup>

<sup>a</sup>*Department of Chemistry, College of Science, North University of China, Taiyuan 030051, China.*

*E-mail: [hutuoping@nuc.edu.cn](mailto:hutuoping@nuc.edu.cn)*

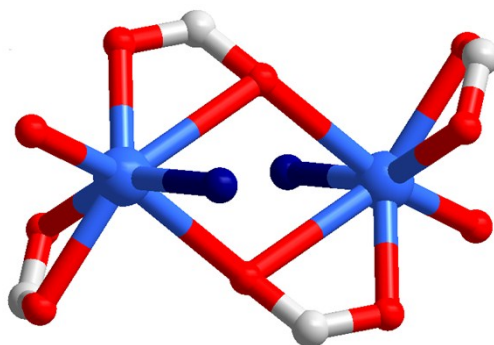

**Fig. S1** The dinuclear  $[\text{Cd}_2(\text{COO})_4]$  SBUs in **1**.

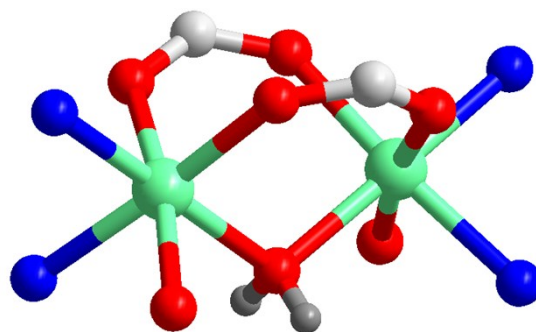

**Fig. S2** The dinuclear  $\{\text{Ni}_2(\text{COO})_2(\mu_2\text{-H}_2\text{O})\}$  SBUs in **4**.

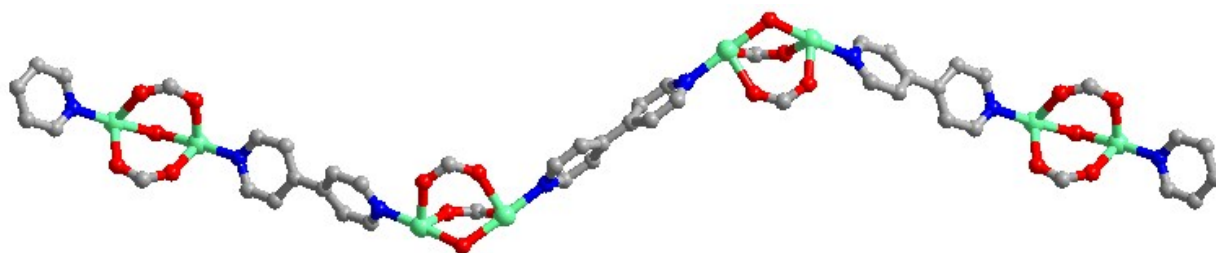

**Fig. S3** The 4,4'-bipy linked the  $\{\text{Ni}_2(\text{COO})_2(\mu_2\text{-H}_2\text{O})\}$  SBUs to form a 1D chain along *a* axis in **4**.

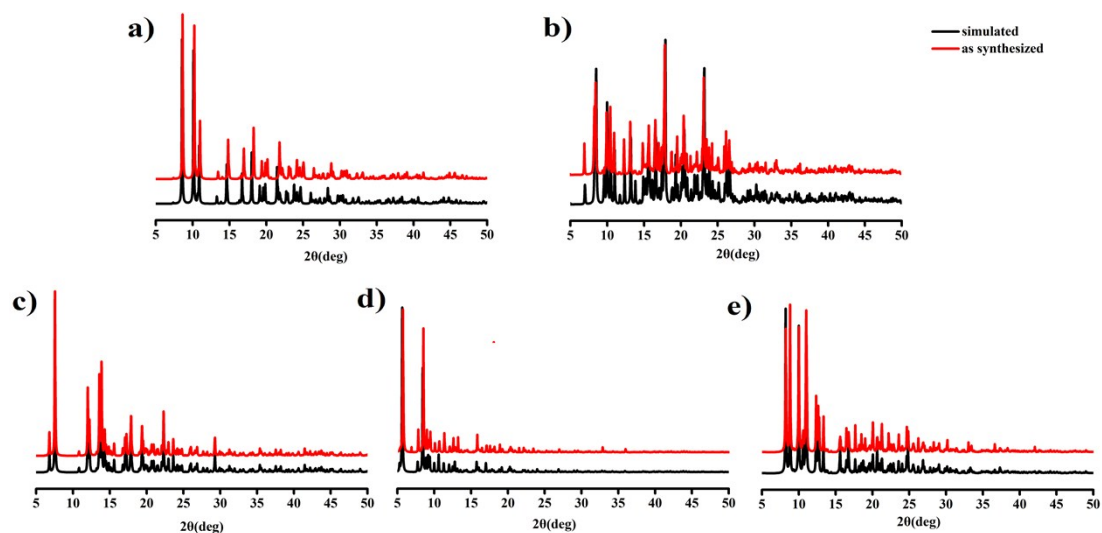

Fig. S4 PXRD patterns of 1-5.

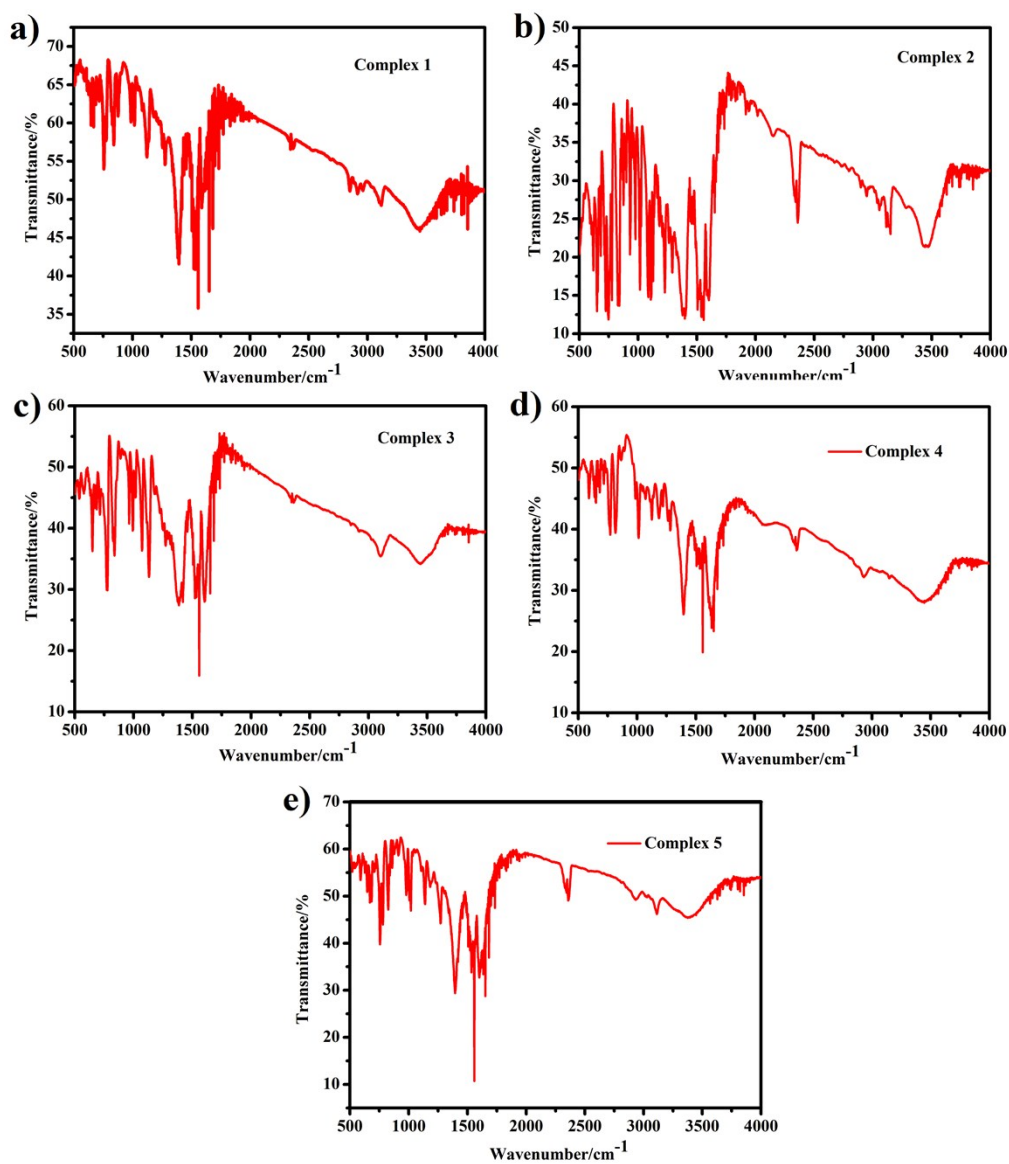

Fig. S5. The IR spectra of 1-5.

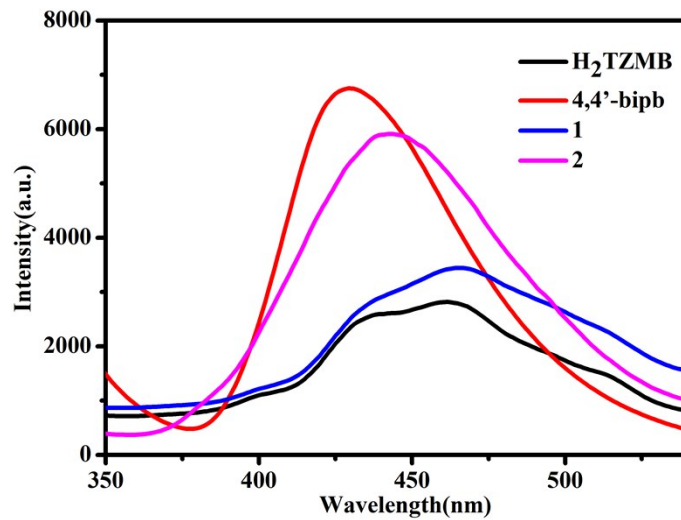

Fig. S6 The luminescence spectrum of organic linkers, complexes 1 and 2 in the solid state at room temperature.

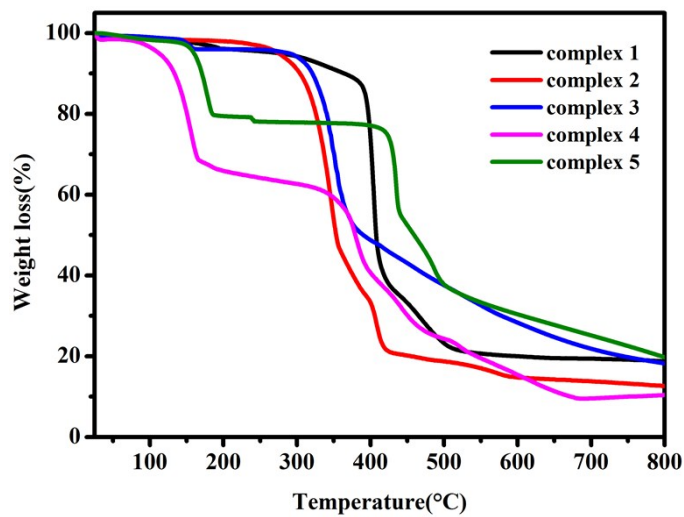

Fig. S7 TGA curves for complexes 1-5.

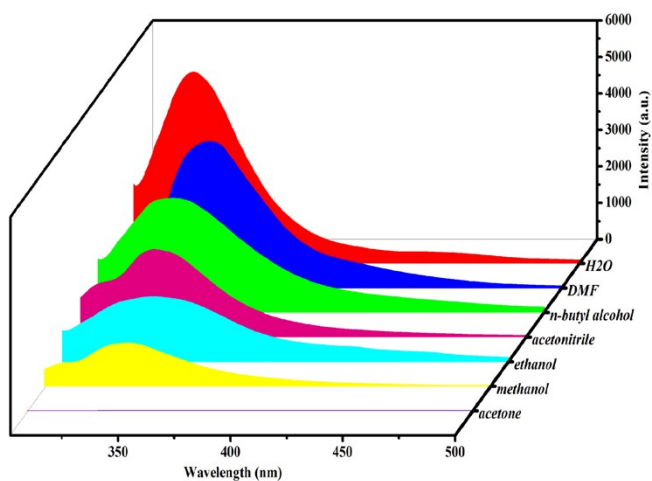

Fig. S8 The luminescence intensities of complex 1 which were dispersed in different organic solvents.

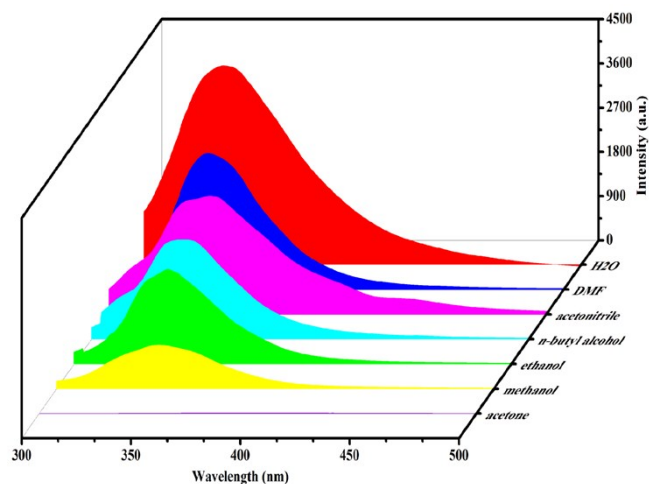

Fig. S9 The luminescence intensities of complex 2 which were dispersed in different organic solvents.

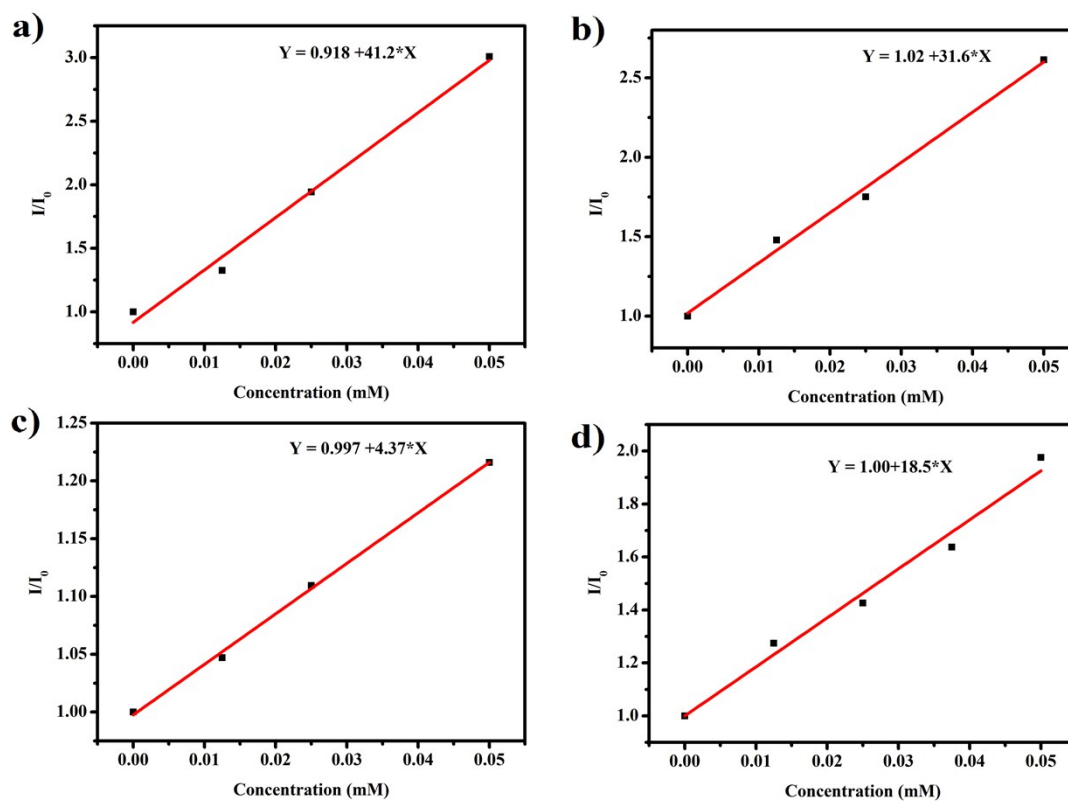

Fig. S10 The linear plots at low concentration of PNP (a), PNT (b), PNA (c) and NB (d) for 1.

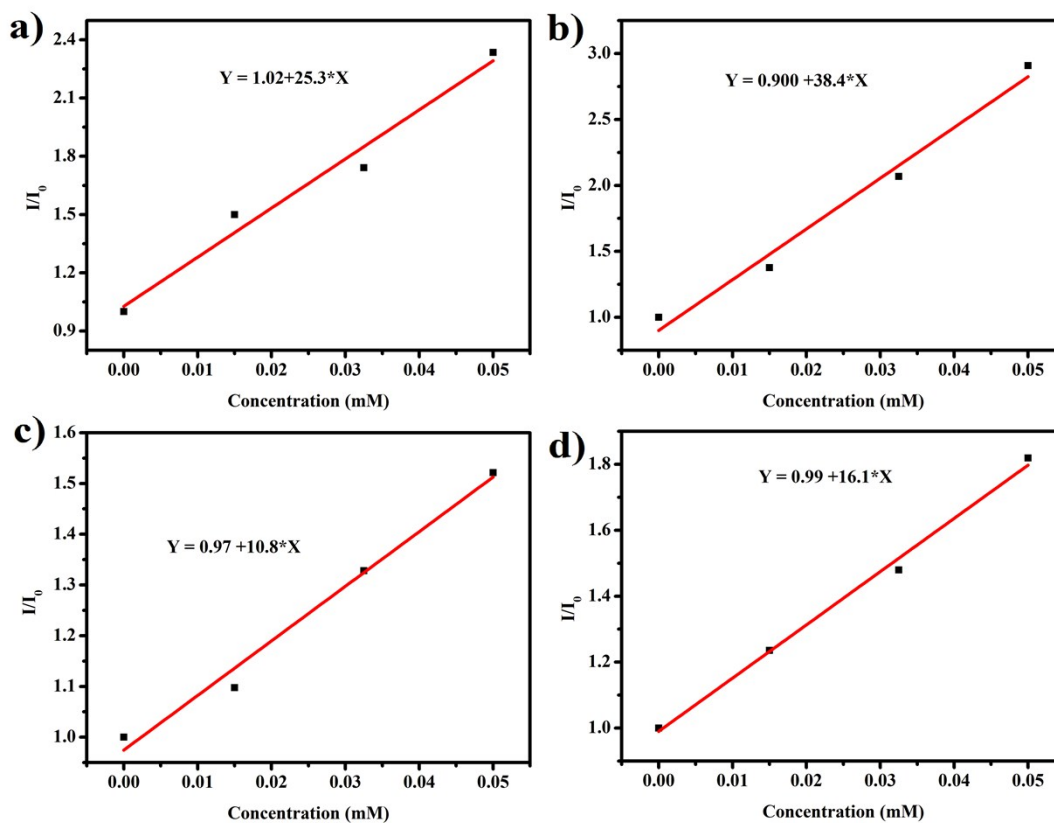

**Fig. S11** The linear plots at low concentration of PNP (a), PNT (b), PNA (c) and NB (d) for 2.

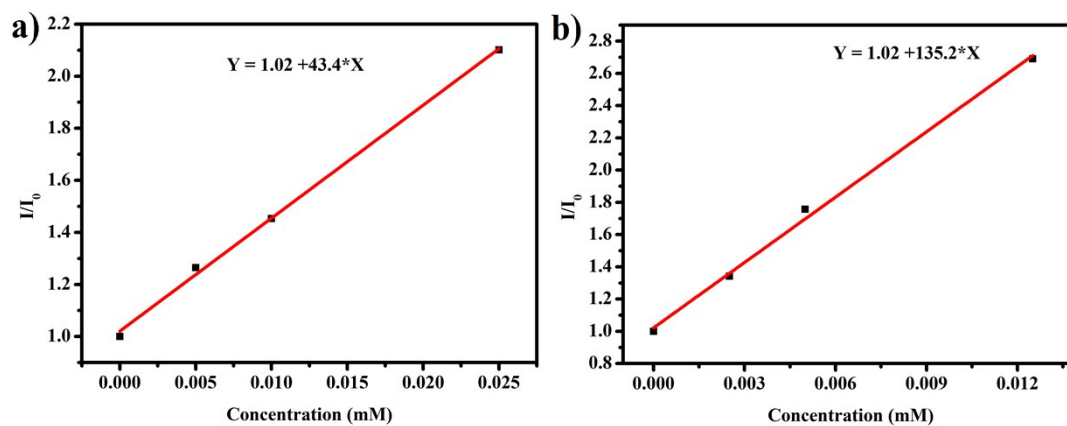

**Fig. S12** The linear plots at low concentration of  $Fe^{3+}$  for 1(a) and 2(b).

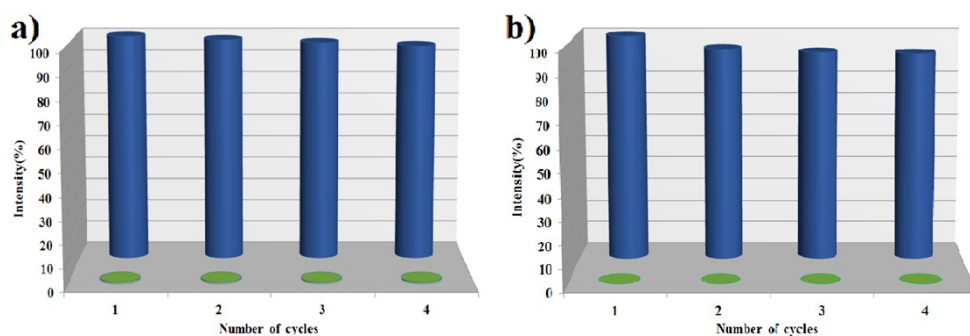

**Fig. S13** Initial fluorescence intensities (blue bars) for 1(a) and 2(b) suspensions and those after addition of  $Fe^{3+}$  aqueous solutions (green bars) in four regeneration cycles.

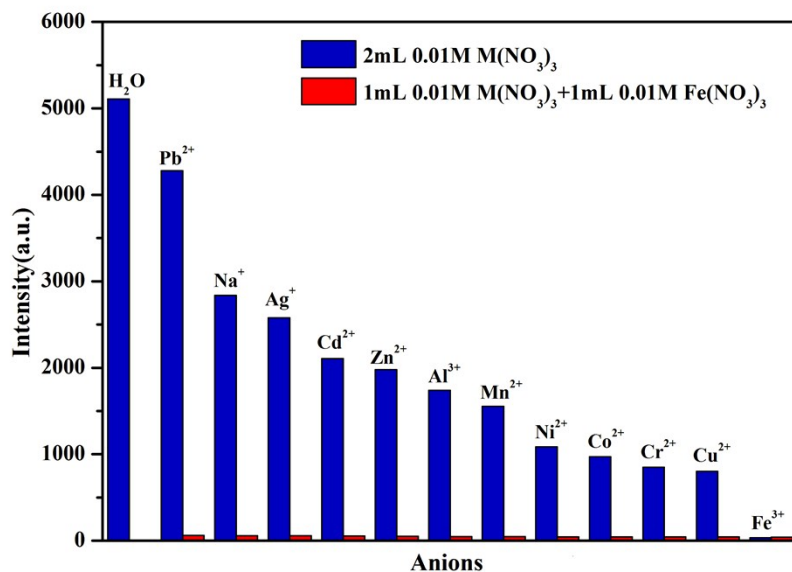

Fig. S14 The anti-interferences of 1 in sensing of Fe<sup>3+</sup> ions from normal anions in aqueous solution.

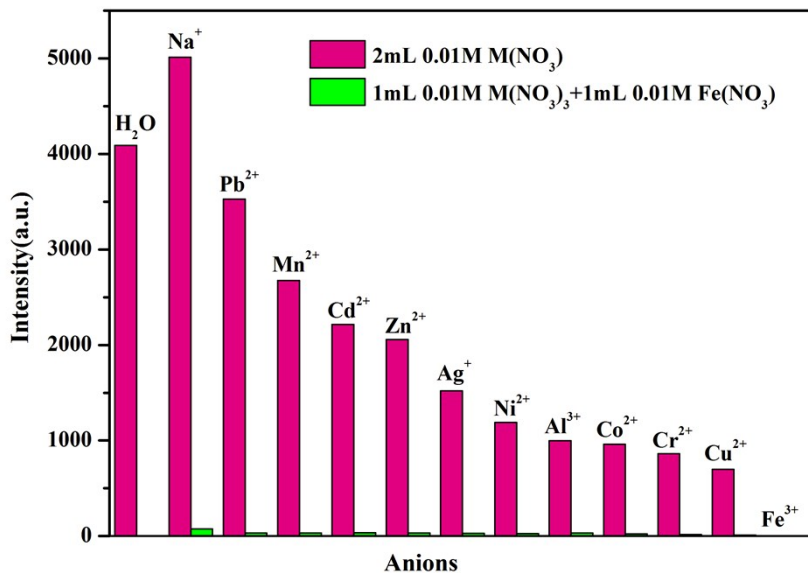

Fig. S15 The anti-interferences of 2 in sensing of Fe<sup>3+</sup> ions from normal anions in aqueous solution.

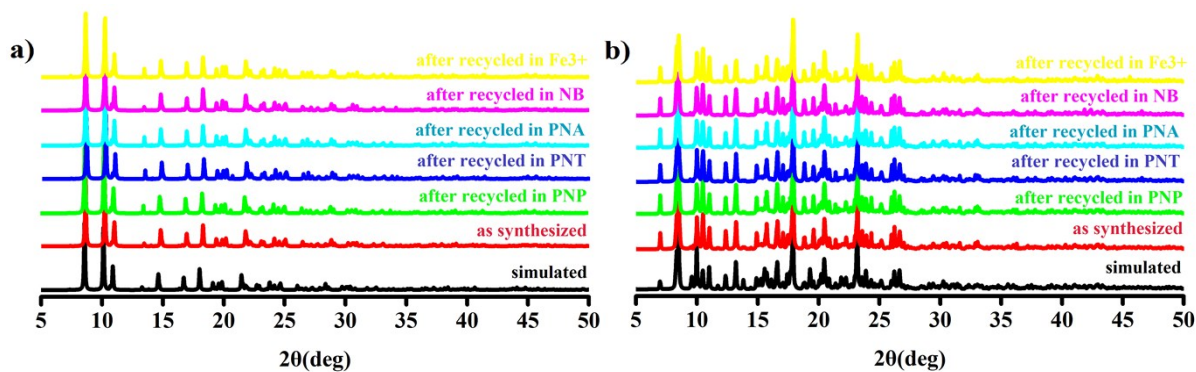

Fig. S16 The PXRD pattern of 1(a) and 2(b) after immersing in analytes.

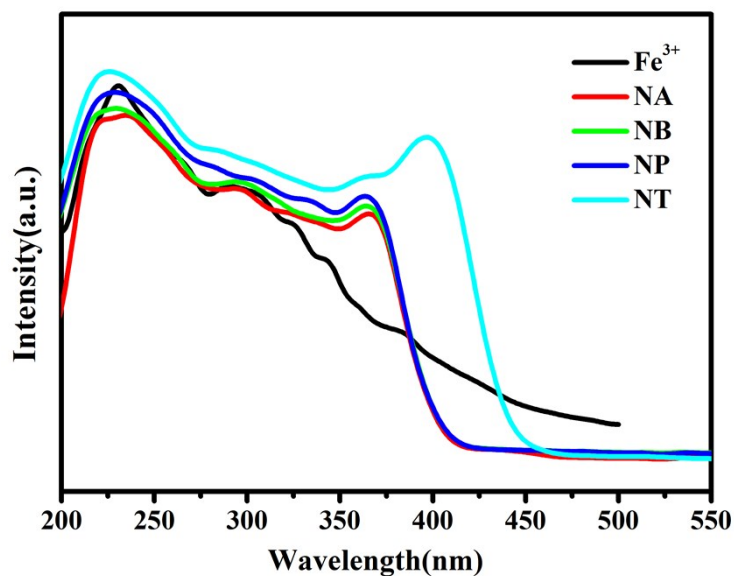

Fig. S17 The UV-Vis spectrum of NACs and  $\text{Fe}^{3+}$ .

Table S1 Selected bond lengths ( $\text{\AA}$ ) and angles (deg) for complex 1.

|                                                                                                                                        |          |             |            |
|----------------------------------------------------------------------------------------------------------------------------------------|----------|-------------|------------|
| Cd1-O1                                                                                                                                 | 2.210(3) | O1-Cd1-O2A  | 111.20(16) |
| Cd1-O2A                                                                                                                                | 2.617(4) | O1-Cd1-O3B  | 136.76(13) |
| Cd1-O3B                                                                                                                                | 2.341(3) | O1-Cd1-O4B  | 86.08(12)  |
| Cd1-O4B                                                                                                                                | 2.442(4) | O1-Cd1-O5   | 93.57(17)  |
| Cd1-O5                                                                                                                                 | 2.365(4) | O1-Cd1-N3C  | 113.46(13) |
| Cd1-N3C                                                                                                                                | 2.261(3) | O3B-Cd1-O2A | 82.33(12)  |
|                                                                                                                                        |          | O3B-Cd1-O4B | 54.74(12)  |
|                                                                                                                                        |          | O3B-Cd1-O5  | 88.38(12)  |
|                                                                                                                                        |          | O5-Cd1-O2A  | 152.08(13) |
|                                                                                                                                        |          | O5-Cd1-O4B  | 115.03(11) |
|                                                                                                                                        |          | N3C-Cd1-O2A | 79.32(12)  |
|                                                                                                                                        |          | N3C-Cd1-O3B | 109.31(12) |
|                                                                                                                                        |          | N3C-Cd1-O4B | 155.96(11) |
|                                                                                                                                        |          | N3C-Cd1-O5  | 79.06(12)  |
| Symmetry codes: A: $3/2-x, 1/2-y, 1-z$ ; B: $+x, +y, 1+z$ ; C: $3/2-x, 1/2+y, 1/2-z$ ; D: $+x, +y, -1+z$ ; E: $3/2-x, -1/2+y, 1/2-z$ . |          |             |            |

Table S2 Selected bond lengths ( $\text{\AA}$ ) and angles (deg) for complex 2

|         |          |            |            |
|---------|----------|------------|------------|
| Cd1-O1  | 2.423(3) | O1-Cd1-O6  | 169.35(9)  |
| Cd1-O2  | 2.367(3) | O2-Cd1-O1  | 54.29(10)  |
| Cd1-O5  | 2.255(3) | O2-Cd1-O6  | 136.27(10) |
| Cd1-O6  | 2.749(3) | O2-Cd1-N7  | 90.02(10)  |
| Cd1-N3A | 2.317(3) | O5-Cd1-O1  | 140.48(10) |
| Cd1-N6B | 2.304(3) | O5-Cd1-O2  | 86.21(10)  |
| Cd1-N7  | 2.410(3) | O5-Cd1-O6  | 50.14(10)  |
|         |          | O5-Cd1-N3A | 91.62(11)  |
|         |          | O5-Cd1-N6A | 128.07(10) |

|                                                                          |  |             |            |
|--------------------------------------------------------------------------|--|-------------|------------|
|                                                                          |  | O5-Cd1-N7   | 88.97(11)  |
|                                                                          |  | N3A-Cd1-O1  | 91.07(10)  |
|                                                                          |  | N3A-Cd1-O2  | 91.83(10)  |
|                                                                          |  | N3A-Cd1-O6  | 87.38(12)  |
|                                                                          |  | N3A-Cd1-N7  | 178.09(11) |
|                                                                          |  | N6B-Cd1-O1  | 91.43(10)  |
|                                                                          |  | N6B-Cd1-O2  | 145.72(11) |
|                                                                          |  | N6B-Cd1-O6  | 77.99(10)  |
|                                                                          |  | N6B-Cd1-N3A | 87.96(10)  |
|                                                                          |  | N6B-Cd1-N7  | 90.25(10)  |
|                                                                          |  | N7-Cd1-O1   | 89.62(10)  |
|                                                                          |  | N7-Cd1-O6   | 91.61(12)  |
| Symmetry codes: A: -1+x,+y,+z; B: +x,1+y,+z; C: 1+x,+y,+z; D: +x,-1+y,+z |  |             |            |

**Table S3** Selected bond lengths (Å) and angles (deg) for complex 3.

|                                                                                                                                                |          |             |           |
|------------------------------------------------------------------------------------------------------------------------------------------------|----------|-------------|-----------|
| Ni1-O1                                                                                                                                         | 2.067(4) | O1-Ni1-O3A  | 85.84(17) |
| Ni1-O3A                                                                                                                                        | 2.094(5) | O1-Ni1-O5   | 95.32(19) |
| Ni1-O5                                                                                                                                         | 2.079(5) | O1-Ni1-N3B  | 88.03(19) |
| Ni1-N3B                                                                                                                                        | 2.077(5) | O1-Ni1-N4   | 85.6(2)   |
| Ni1-N4                                                                                                                                         | 2.110(6) | O1-Ni1-N5C  | 172.2(2)  |
| Ni1-N5C                                                                                                                                        | 2.136(5) | O3A-Ni1-N4  | 171.4(2)  |
|                                                                                                                                                |          | O3A-Ni1-N5C | 86.6(2)   |
|                                                                                                                                                |          | O5-Ni1-O3A  | 92.56(19) |
|                                                                                                                                                |          | O5-Ni1-N4   | 88.0(2)   |
|                                                                                                                                                |          | O5-Ni1-N5C  | 86.9(2)   |
|                                                                                                                                                |          | N3B-Ni1-O3A | 86.9(2)   |
|                                                                                                                                                |          | N3B-Ni1-O5  | 176.6(2)  |
|                                                                                                                                                |          | N3B-Ni1-N4  | 93.0(2)   |
|                                                                                                                                                |          | N3B-Ni1-N5C | 89.6(2)   |
|                                                                                                                                                |          | N4-Ni1-N5C  | 102.0(2)  |
| Symmetry codes: A: x, 1-y, 0.5+z; B: 1-x, 1+y, 1.5-z; C: 0.5-x, 2.5-y, 0.5+z; D: x, 1-y, -0.5+z; E: 1-x, -1+y, 1.5-z; F: 0.5-x, 2.5-y, -0.5+z. |          |             |           |

**Table S4** Selected bond lengths (Å) and angles (deg) for complex 4.

|                                                                                                                            |            |             |           |
|----------------------------------------------------------------------------------------------------------------------------|------------|-------------|-----------|
| Ni1-O1W                                                                                                                    | 2.0608(14) | O1W-Ni1-N3B | 91.78(8)  |
| Ni1-O2                                                                                                                     | 2.0327(18) | O2-Ni1-O1W  | 93.02(6)  |
| Ni1-O1A                                                                                                                    | 2.0589(19) | O1A-Ni1-O1W | 92.88(7)  |
| Ni1-O4B                                                                                                                    | 2.0512(19) | O4C-Ni1-O1W | 90.04(7)  |
| Ni1-N3C                                                                                                                    | 2.108(2)   | N4-Ni1-O1W  | 177.39(7) |
| Ni1-N4                                                                                                                     | 2.055(2)   | N4-Ni1-O1A  | 85.76(8)  |
|                                                                                                                            |            | N4-Ni1-N3B  | 89.48(9)  |
| Symmetry codes: A: 1/3+x-y, 2/3-y, 7/6-z; B: 1/3+x, 2/3+x-y, 1/6+z; C: 1/3-x+y, -1/3+y, 1/6+z; D: y, x, 3/2-z; E: 2/3-x+y, |            |             |           |



1/3+y, -1/6+z; F: -1/3+x, 1/3+x-y, -1/6+z.

**Table S5** Selected bond lengths (Å) and angles (deg) for complex **5**

|                                                                                                                                                                                                                                      |           |                          |            |
|--------------------------------------------------------------------------------------------------------------------------------------------------------------------------------------------------------------------------------------|-----------|--------------------------|------------|
| Mn1-O1                                                                                                                                                                                                                               | 2.072(4)  | O1-Mn1-O5A               | 92.17(16)  |
| Mn1-O5A                                                                                                                                                                                                                              | 2.167(4)  | O1-Mn1-O6B               | 99.08(17)  |
| Mn1-O6B                                                                                                                                                                                                                              | 2.267(4)  | O1-Mn1-O7B               | 157.21(17) |
| Mn1-O7B                                                                                                                                                                                                                              | 2.267(3)  | O1-Mn1-O10C              | 91.85(17)  |
| Mn1-O10C                                                                                                                                                                                                                             | 2.150(4)  | O1-Mn1-N3D               | 96.2(2)    |
| Mn1-N3D                                                                                                                                                                                                                              | 2.209(5)  | O5A-Mn1-O6B              | 84.13(15)  |
| Mn2-O2A                                                                                                                                                                                                                              | 2.199(4)  | O5 <sup>1</sup> -Mn1-O7B | 87.04(14)  |
| Mn2-O3                                                                                                                                                                                                                               | 2.110(4)  | O5A-Mn1-N3D              | 87.97(16)  |
| Mn2-O4                                                                                                                                                                                                                               | 2.100(4)  | O7B-Mn1-O6B              | 58.17(13)  |
| Mn2-O8                                                                                                                                                                                                                               | 2.210(15) | O10C-Mn1-O5A             | 175.76(15) |
| Mn2-O8A                                                                                                                                                                                                                              | 2.250(7)  | O10C-Mn1-O6B             | 96.57(15)  |
| Mn2-O9                                                                                                                                                                                                                               | 2.229(4)  | O10C-Mn1-O7B             | 89.78(15)  |
| Mn2-N6E                                                                                                                                                                                                                              | 2.254(4)  | O10C-Mn1-N3E             | 90.25(16)  |
|                                                                                                                                                                                                                                      |           | N3D-Mn1-O6B              | 163.03(16) |
|                                                                                                                                                                                                                                      |           | N3D-Mn1-O7B              | 106.52(16) |
|                                                                                                                                                                                                                                      |           | O2A-Mn2-O8               | 80.8(5)    |
|                                                                                                                                                                                                                                      |           | O2A-Mn2-O8A              | 101.7(2)   |
|                                                                                                                                                                                                                                      |           | O2A-Mn2-O9               | 175.71(17) |
|                                                                                                                                                                                                                                      |           | O2A-Mn2-N6E              | 87.20(16)  |
|                                                                                                                                                                                                                                      |           | O3-Mn2-O2A               | 91.40(17)  |
|                                                                                                                                                                                                                                      |           | O3-Mn2-O8                | 81.9(4)    |
|                                                                                                                                                                                                                                      |           | O3-Mn2-O8A               | 86.1(2)    |
|                                                                                                                                                                                                                                      |           | O3-Mn2-O9                | 89.36(16)  |
|                                                                                                                                                                                                                                      |           | O3-Mn2-N6E               | 90.07(16)  |
|                                                                                                                                                                                                                                      |           | O4-Mn2-O2A               | 94.46(17)  |
|                                                                                                                                                                                                                                      |           | O4-Mn2-O3                | 168.82(18) |
|                                                                                                                                                                                                                                      |           | O4-Mn2-O8                | 89.6(4)    |
|                                                                                                                                                                                                                                      |           | O4-Mn2-O8A               | 83.4(2)    |
|                                                                                                                                                                                                                                      |           | O4-Mn2-O9                | 85.50(16)  |
|                                                                                                                                                                                                                                      |           | O4-Mn2-N6E               | 99.70(18)  |
|                                                                                                                                                                                                                                      |           | O8-Mn2-O9                | 103.5(5)   |
|                                                                                                                                                                                                                                      |           | O8-Mn2-N6E               | 165.4(5)   |
|                                                                                                                                                                                                                                      |           | O8A-Mn2-N6E              | 170.4(2)   |
|                                                                                                                                                                                                                                      |           | O9-Mn2-O8A               | 82.5(2)    |
|                                                                                                                                                                                                                                      |           | O9-Mn2-N6E               | 88.58(16)  |
| Symmetry codes: A: 1-x, 1-y, 1-z; B: -0.5+x, 1.5+y, -1+z; C: 1-x, 2-y, 1-z; D: x, 2-y, -0.5+z; E: x, -y, -0.5+z; F: 0.5+x, -1.5+y, 1+z; G: x, -y, 0.5+z; H: x, 2-y, 0.5+z; I: 1-x, -1-y, 1.5-z; J: x, -1+y, z; K: 1.5-x, -0.5-y, 2-z |           |                          |            |

**Table S6** Geometrical parameters of hydrogen bonds (Å) for CP 1

| D-H...A       | d(D-H) (Å) | d(H...A) (Å) | d(D...A) (Å) | ∠(DHA) (°) | Symmetry cod       |
|---------------|------------|--------------|--------------|------------|--------------------|
| O1W-H6A...O3  | 0.86       | 2.28         | 3.133(6)     | 174        | 1/2-x,1/2-y,-z     |
| C3-H3...O1    | 0.93       | 2.54         | 3.413(7)     | 157        | 1-x,y,1/2-z        |
| C7-H7...O5    | 0.93       | 2.50         | 2.997(6)     | 113        | 3/2-x,-1/2+y,1/2-z |
| C8-H8...O4    | 0.93       | 2.30         | 3.180(5)     | 157        | x,-y,1/2+z         |
| C16-H16...N1  | 0.93       | 2.55         | 2.876(6)     | 101        |                    |
| C16-H16...N2  | 0.93       | 2.47         | 3.109(6)     | 126        |                    |
| C17-H17...O3  | 0.93       | 2.39         | 3.297(6)     | 163        | 3/2-x,1/2-y,-z     |
| C19-H19A...O5 | 0.96       | 2.40         | 2.790(16)    | 104        |                    |

**Table S7** Geometrical parameters of hydrogen bonds (Å) for CP 2

| D-H...A      | d(D-H) (Å) | d(H...A) (Å) | d(D...A) (Å) | ∠(DHA) (°) | Symmetry cod |
|--------------|------------|--------------|--------------|------------|--------------|
| O4-H4...N8   | 0.82       | 1.87         | 2.624(5)     | 152        | -1+x,1+y,1+z |
| O8-H8...N10  | 0.82       | 1.92         | 2.709(8)     | 161        | 2-x,-y,-z    |
| O1W-H9A...O1 | 0.85       | 1.98         | 2.833(9)     | 179        | 1-x,1-y,1-z  |
| O1W-H9...O1W | 0.85       | 1.21         | 1.857(12)    | 127        | 2-x,-y,1-z   |
| O1W-H9B...O1 | 0.85       | 2.28         | 2.882(9)     | 128        | 1+x,-1+y,z   |
| C6-H6...O2   | 0.98       | 2.60         | 3.445(5)     | 145        | 1-x,1-y,1-z  |
| C8-H8A...O2  | 0.93       | 2.43         | 3.241(5)     | 145        | 1-x,1-y,1-z  |
| C10-H10...O5 | 0.93       | 2.58         | 3.485(5)     | 165        | 1-x,1-y,1-z  |
| C14-H14...O4 | 0.93       | 2.37         | 2.697(5)     | 100        |              |
| C16-H16...N2 | 0.93       | 2.55         | 3.188(6)     | 126        |              |
| C25-H25...N9 | 0.93       | 2.38         | 3.301(5)     | 170        | x,-1+y,z     |
| C31-H31...O3 | 0.93       | 2.47         | 3.368(6)     | 164        | 1-x,1-y,1-z  |
| C76-H76...O3 | 0.93       | 2.44         | 3.364(6)     | 170        | 2-x,1-y,1-z  |
| C77-H77...O3 | 0.93       | 2.43         | 3.360(9)     | 175        | 2-x,1-y,1-z  |
